# Supplementary material
Source: PubMed Central journal article supplement (PMC7857436)
Supplement: EMBR-22-e51162-s001.pdf [file EMBR-22-e51162-s001.pdf]

## Appendix

|                                                                                                       |    |
|-------------------------------------------------------------------------------------------------------|----|
| Appendix Figure S1. OTUD1 deubiquitinases IREB2.....                                                  | 2  |
| Appendix Figure S2. OTUD1 promotes TFRC expression.....                                               | 4  |
| Appendix Figure S3. Downregulation of OTUD1 is correlated with poor outcome of colorectal cancer..... | 6  |
| Appendix Figure S4. OTUD1 augments host anti-tumor immunity.....                                      | 7  |
| Appendix Figure S5. OTUD1 promotes ferroptosis.....                                                   | 9  |
| Appendix Figure S6. OTUD1 promotes ROS accumulation.....                                              | 11 |
| Appendix Figure S7. Loss of OTUD1 impedes host anti-tumor immunity.....                               | 13 |
| Appendix Table S1. The primers used for quantitative real-time PCR.....                               | 14 |

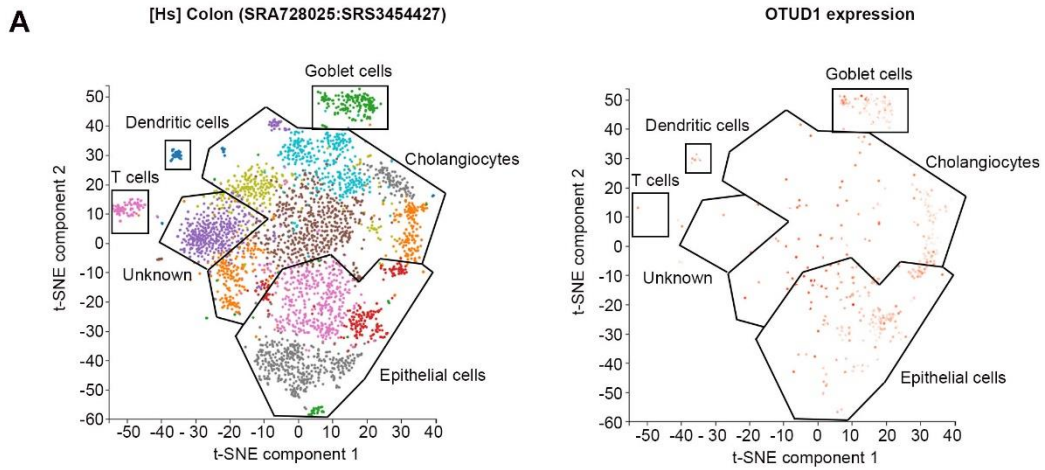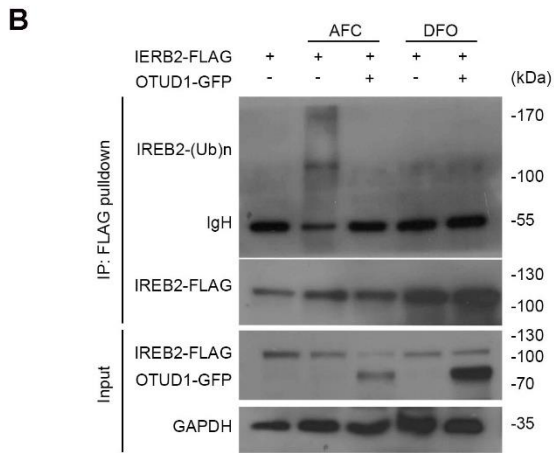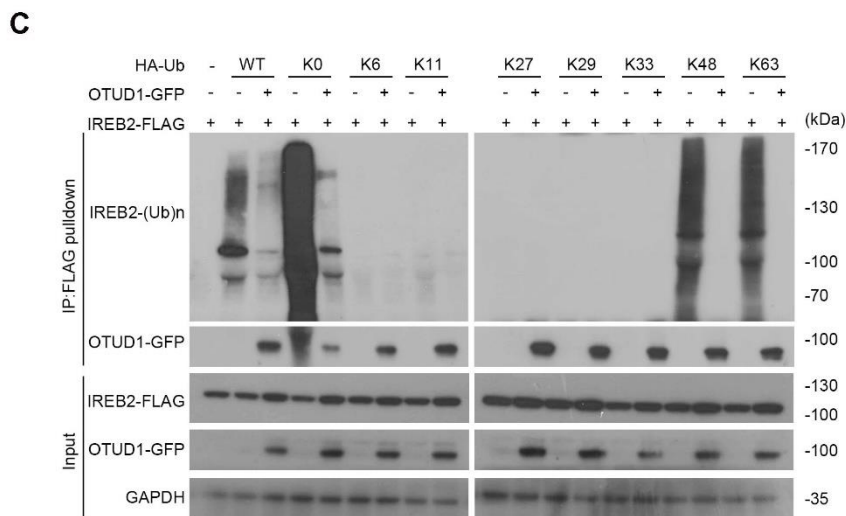

**Appendix Figure S1. OTUD1 deubiquitinases IREB2.**

(A) t-Distributed stochastic neighbor embedding (t-SNE) plot of RNA-sequenced (scRNA-seq) single cells from human colon tissues (Left) and the expression of OTUD1 in different cell population (Right).

(B and C) *In vivo* ubiquitination assay of IREB2. HEK293T cells were co-transfected with indicated plasmids, treated with indicated reagents and subjected to immunoprecipitation with anti-FLAG antibody followed by western blot analysis.

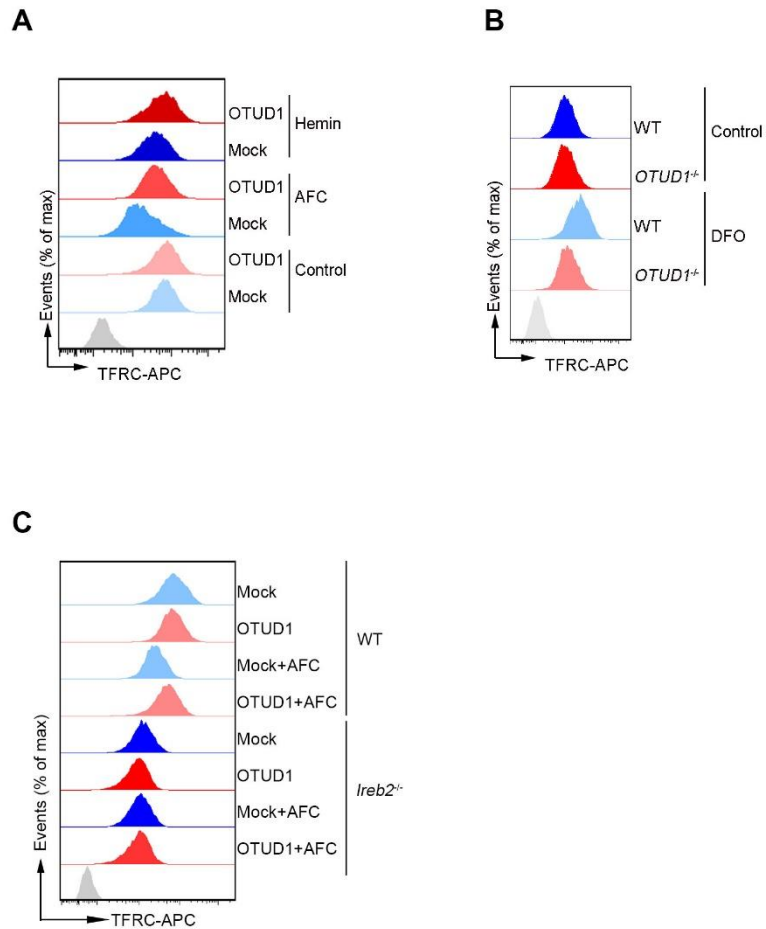

**Appendix Figure S2. OTUD1 promotes TFRC expression.**

(A) Flow cytometric analysis of TFRC expression in mock and OTUD1 expressing CT26 cells with Hemin (100  $\mu$ M) and AFC (50  $\mu$ M) treatment. Gray shaded curve indicates isotype-matched control antibody.

(B) Flow cytometric analysis of TFRC expression in wild-type (WT) and *OTUD1<sup>-/-</sup>* NCM460 cells with DFO (100 $\mu$ M) treatment. Gray shaded curve indicates isotype-matched control antibody.

(C) Flow cytometric analysis of TFRC expression in wild-type (WT) or *Ireb2*<sup>-/-</sup> CT26 cells with or without OTUD1 overexpression treated with AFC (50 μM). Gray shaded curve indicates isotype-matched control antibody.

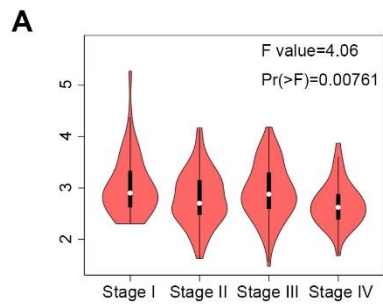

**Appendix Figure S3. Downregulation of OTUD1 is correlated with poor outcome of colorectal cancer.**

(A) Violin plot of *OTUD1* mRNA levels in colorectal cancers at different clinical stages.

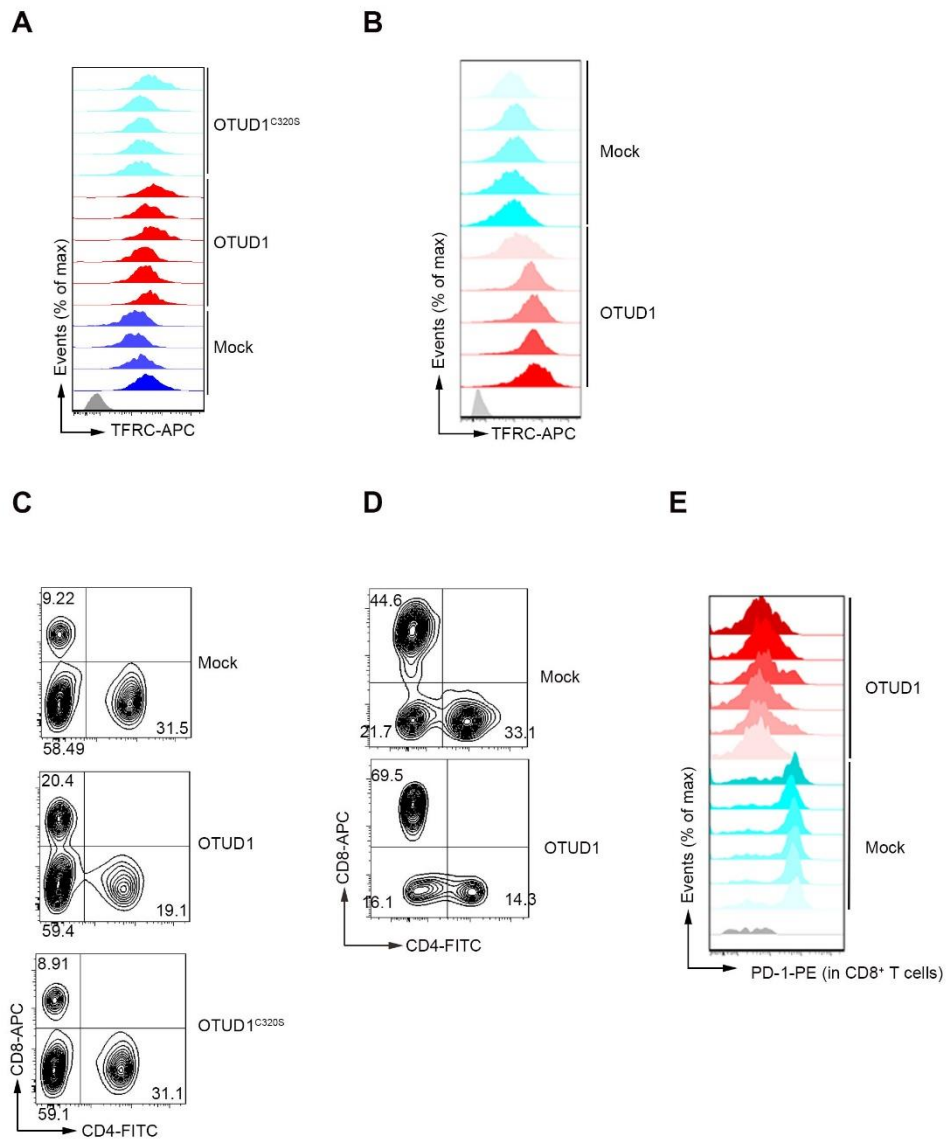

**Appendix Figure S4. OTUD1 augments host anti-tumor immunity.**

(A) Flow cytometric analysis of TFRC expression in mock (n = 4 tumors), OTUD1 (n = 6 tumors) and OTUD1<sup>C320S</sup> (n = 5 tumors) expressing CT26 tumors. Gray shaded curve indicates isotype-matched control antibody.

(B) Flow cytometric analysis of TFRC expression in mock or OTUD1 expressing LLC tumors. Gray shaded curve indicates isotype-matched control antibody.

(C) Flow cytometric analysis of CD8<sup>+</sup> T cells, CD4<sup>+</sup> T cells isolated from mock, OTUD1 and OTUD1<sup>C320S</sup> expressing CT26 tumors in BALB/c mice.

(D and E) Flow cytometric analysis of CD8<sup>+</sup> T cells, CD4<sup>+</sup> T cells (D) and PD-1 expression in T cells (n = 6 mice) (E) isolated from mock and OTUD1 overexpressing LLC tumors. Gray shaded curve indicates isotype-matched control antibody.



**A**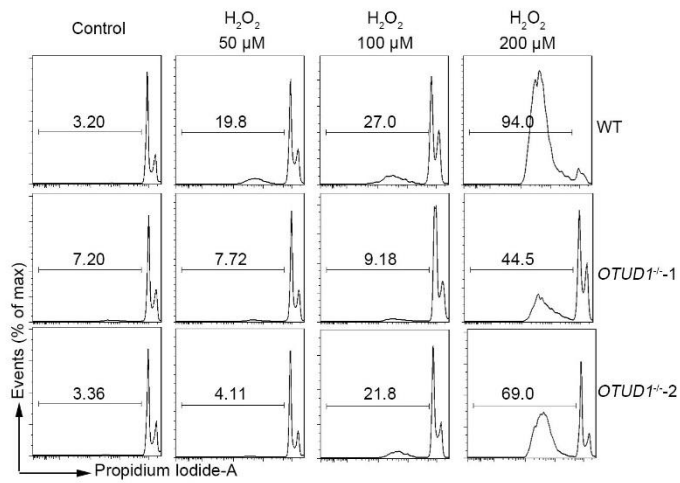**B**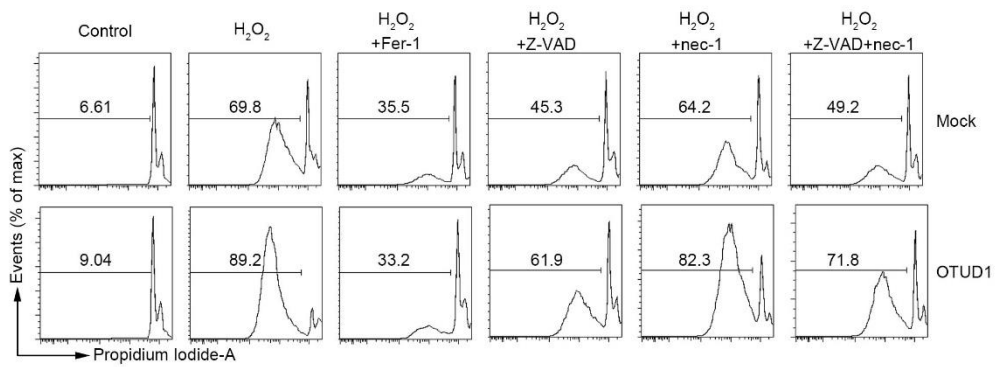**C**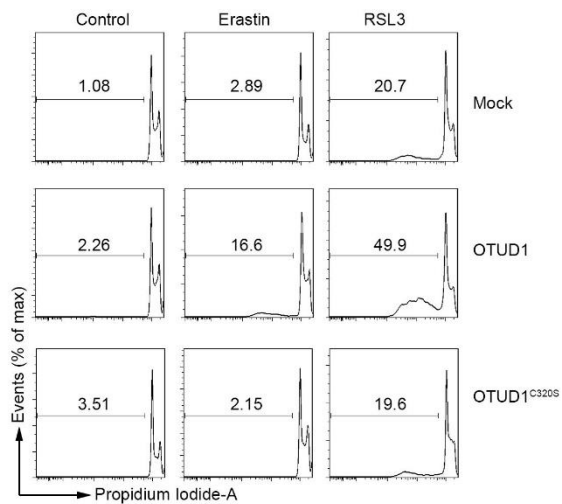**D**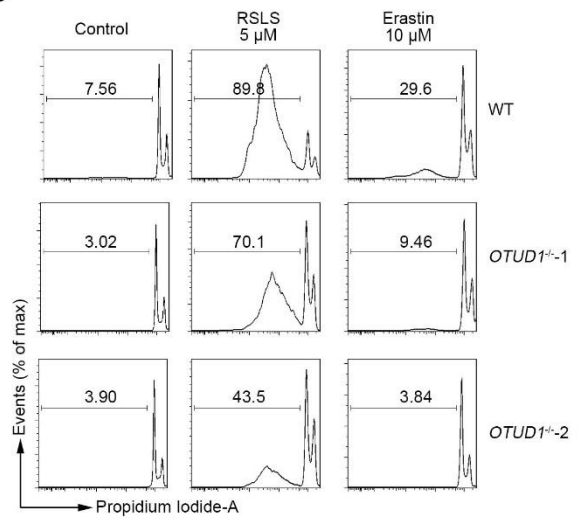

**Appendix Figure S5. OTUD1 promotes ferroptosis.**

(A) Histogram of propidium iodide (PI) in wild-type (WT) and *OTUD1*<sup>-/-</sup> NCM460 cells treated by H<sub>2</sub>O<sub>2</sub>.

(B) Histogram of propidium iodide (PI) in mock and OTUD1 expressing CT26 cells treated by H<sub>2</sub>O<sub>2</sub> and cell death inhibitors.

(C) Histogram of propidium iodide (PI) in mock, OTUD1 or OTUD1<sup>C320S</sup> expressing CT26 cells treated by ferroptosis activators.

(D) Histogram of PI in wild-type (WT) and *OTUD1*<sup>-/-</sup> NCM460 cells treated by ferroptosis activators.

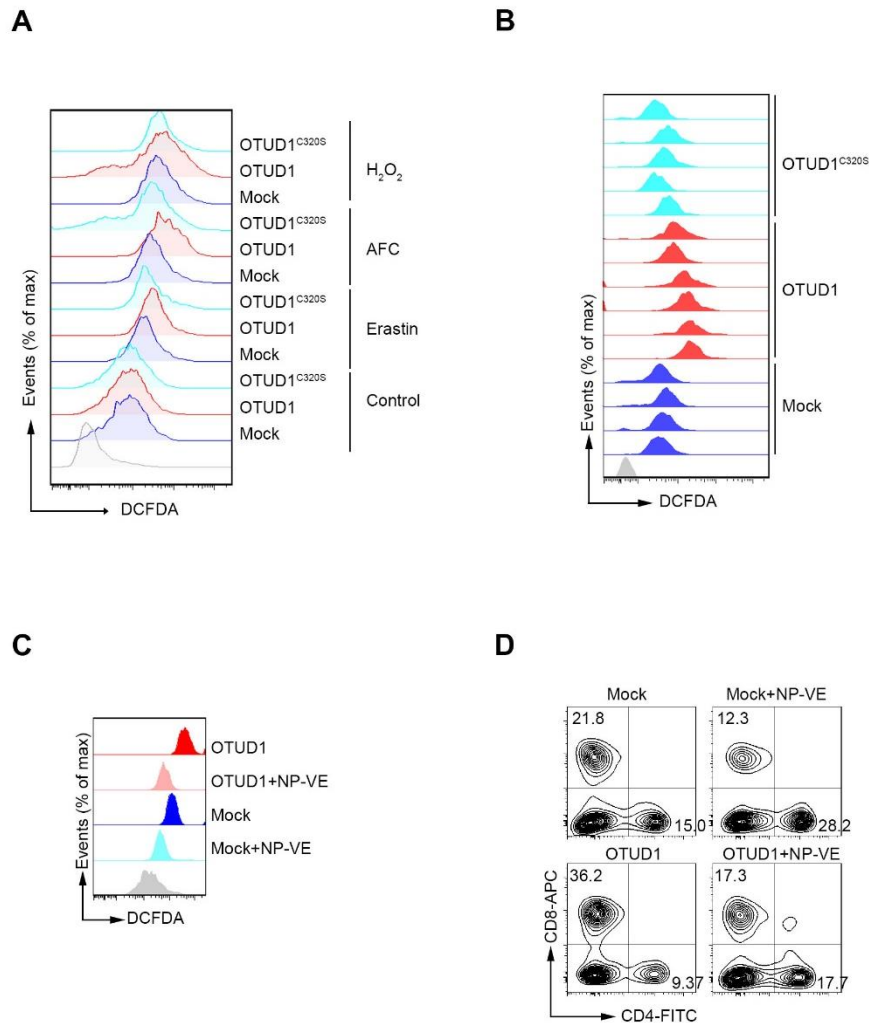

**Appendix Figure S6. OTUD1 promotes ROS accumulation.**

(A) Intracellular ROS levels in mock, OTUD1 and OTUD1<sup>C320S</sup> overexpressing CT26 cells treated with Erastin (10  $\mu$ M), AFC (50  $\mu$ M) or H<sub>2</sub>O<sub>2</sub> (100  $\mu$ M) were detected by DCFDA staining. Gray shaded curve indicates isotype-matched control antibody.

(B) Intracellular ROS levels in mock (n = 4 tumors), OTUD1 (n = 6 tumors) or OTUD1<sup>C320S</sup> (n = 5 tumors) expressing CT26 tumors were detected by DCFDA staining. Gray shaded curve indicates isotype-matched control antibody.

(C) Flow cytometric analysis of DCFDA in mock or OTUD1 expressing CT26 tumors with or without intratumoral injection of NP-VE. Gray shaded curve indicates isotype-matched control antibody.

(D) Tumor infiltrating CD4<sup>+</sup> T cells and CD8<sup>+</sup> T cells of mock or OTUD1 expressing CT26 tumors with or without intratumoral injection of NP-VE.

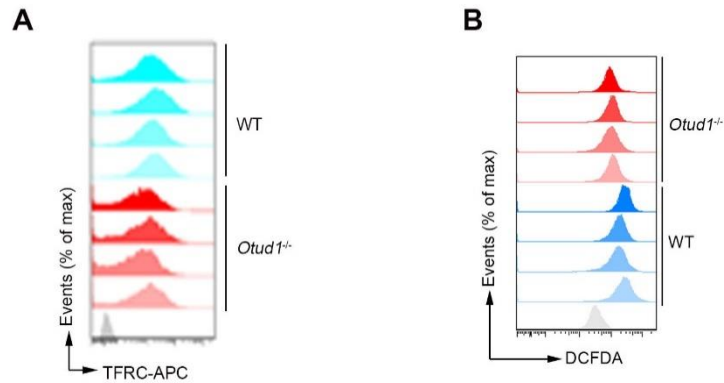

**Appendix Figure S7. Loss of OTUD1 impedes host anti-tumor immunity.**

(A) Flow cytometric analysis of TFRC expression in intestinal epithelial cells (IECs) from wild-type (WT) and *Otud1<sup>-/-</sup>* mice treated with AOM/DSS. Gray shaded curve indicates isotype-matched control antibody. (n = 4 mice).

(B) Intracellular ROS levels in colon tissues from wild-type (WT) or *Otud1<sup>-/-</sup>* mice treated with AOM/DSS (n = 4 mice) were detected by DCFDA staining. Gray shaded curve indicates isotype-matched control antibody. (n = 4 mice).

**Appendix Table S1. The primers used for quantitative real-time PCR.**

| Primer name  | Sequence (5'→3') -Forward | Sequence (5'→3') -Reverse |
|--------------|---------------------------|---------------------------|
| <i>OTUD1</i> | GATTCCTGAGGCCTAGTATTT     | CAGTTGTCGTA CTCTGGGTTAG   |
| <i>TFRC</i>  | GGTGACCCTTACACACCTGGATT   | TGATGACCGAGATGGTGGAA      |
| <i>IREB2</i> | CTGCCGAGGATCTTGTGATTC     | GGGTGTATTCTCAATCTGCGAA    |
| <i>GAPDH</i> | ACCACTCCTCCACCTTTGA       | CTGTTGCTGTAGCCAAATTCGT    |
