# Supplementary material
Source: PubMed Central journal article supplement (PMC7857436)

**Figure 1C**

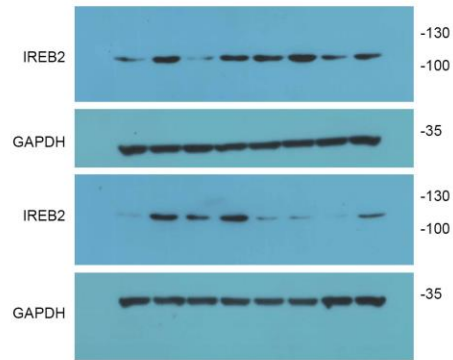

**Figure 1D**

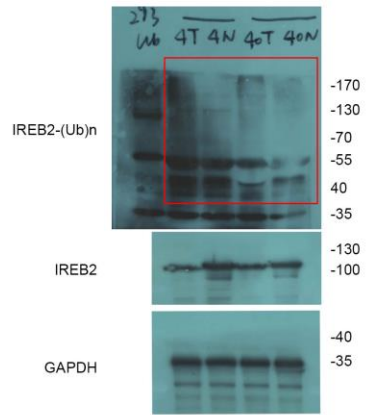

**Figure 1E**

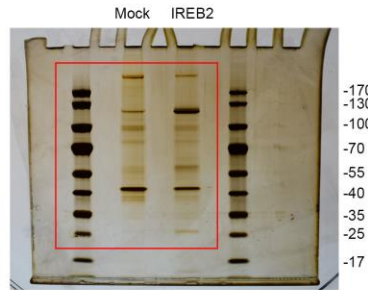

**Figure 1F**

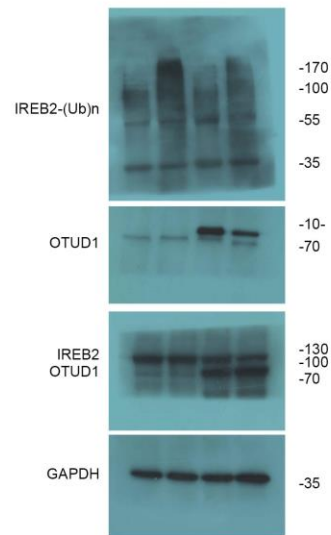

**Figure 1G**

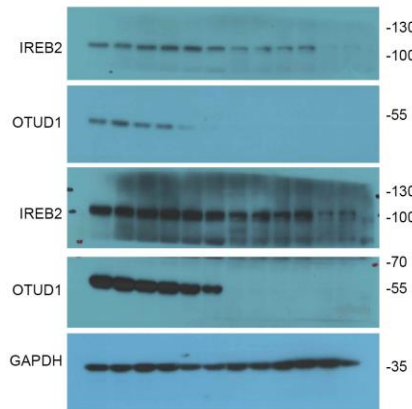

Supplement: EMBR-22-e51162-s003.pdf [file EMBR-22-e51162-s003.pdf]

**Figure 2C**

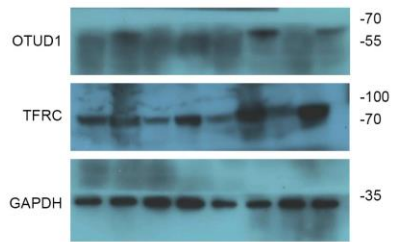

Supplement: EMBR-22-e51162-s004.pdf [file EMBR-22-e51162-s004.pdf]

**Figure 3C**

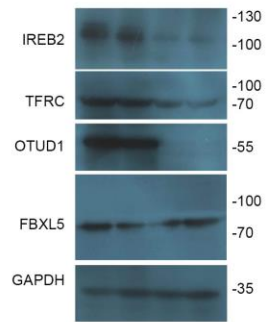

Supplement: EMBR-22-e51162-s005.pdf [file EMBR-22-e51162-s005.pdf]

**Figure 4F**

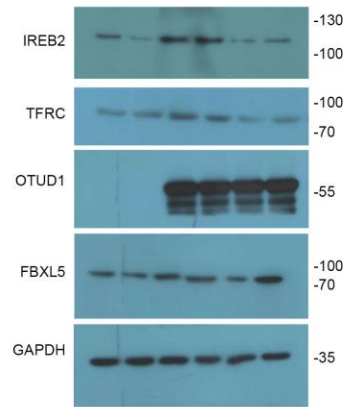

Supplement: EMBR-22-e51162-s006.pdf [file EMBR-22-e51162-s006.pdf]

**Figure 6D**

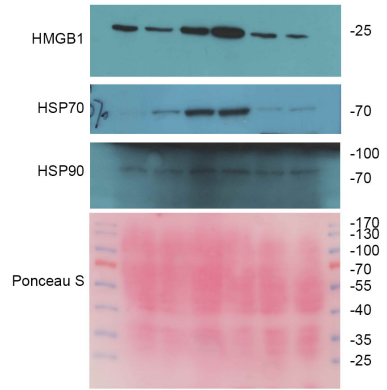

Supplement: EMBR-22-e51162-s007.pdf [file EMBR-22-e51162-s007.pdf]
